# Supplementary material
Source: Springer Nature journal article supplement (https://www.springerprofessional.de/resource/supplementary/13638_2011_197_MOESM5_ESM.pdf/11897240)

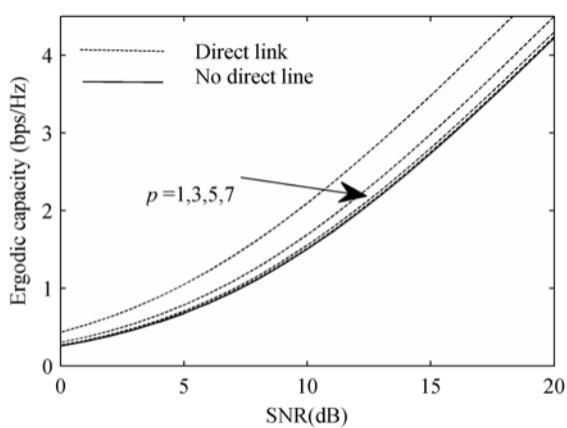

(a) Effect on ergodic capacity

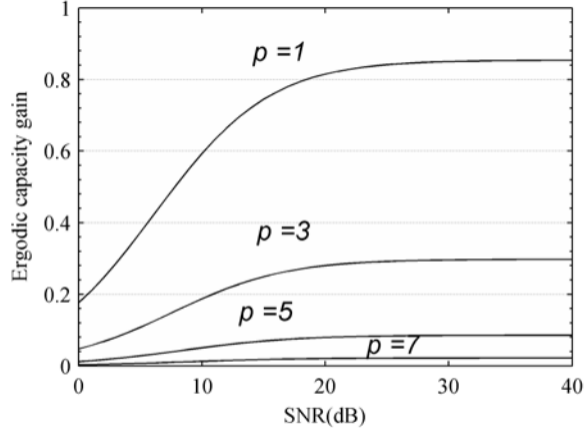

(b) Ergodic capacity gain of TWOR-AFNC-Dir systems

Supplement: MOESM5 [file 11897240]
